# Supplementary material for: Longitudinal surveillance of kelch13 identifies C469Y, P553L, R561H and A675V mutations associated with artemisinin resistance in Western Kenya
Source: Research Square preprint supplement (doi:10.21203/rs.3.rs-6890493/v1), 2025-06-25
Supplement: Supplementary file 1 [file df202125ab7e9a601399ada5.docx]

Supplementary Table1: Distribution of k13 Mutations Detected in the Population (2019–2023)

|  | **Bungoma** | | | **Busia** | | | **Homa Bay** | | | **Kakamega** | | | **Kisumu** | | | **Migori** | | | **Siaya** | | | **Vihiga** | | |
| --- | --- | --- | --- | --- | --- | --- | --- | --- | --- | --- | --- | --- | --- | --- | --- | --- | --- | --- | --- | --- | --- | --- | --- | --- |
|  | **2019** | **2022** | **2023** | **2019** | **2022** | **2023** | **2019** | **2022** | **2023** | **2019** | **2022** | **2023** | **2019** | **2022** | **2023** | **2019** | **2022** | **2023** | **2019** | **2022** | **2023** | **2019** | **2022** | **2023** |
| P441A | 0 | 0 | 0 | 0 | 1 | 0 | 0 | 0 | 0 | 0 | 0 | 0 | 0 | 1 | 0 | 0 | 2 | 0 | 0 | 2 | 0 | 0 | 0 | 0 |
| G453C | 0 | 0 | 0 | 0 | 2 | 0 | 0 | 0 | 0 | 0 | 1 | 0 | 0 | 0 | 0 | 0 | 1 | 0 | 0 | 2 | 0 | 0 | 0 | 0 |
| **C469Y** | 0 | 2 | 4 | 0 | 4 | 0 | 0 | 0 | 0 | 0 | 0 | 1 | 0 | 3 | 0 | 0 | 2 | 3 | 0 | 9 | 0 | 0 | 1 | 0 |
| C471R | 0 | 0 | 0 | 0 | 0 | 1 | 0 | 0 | 2 | 0 | 0 | 1 | 0 | 0 | 3 | 0 | 0 | 1 | 0 | 0 | 0 | 0 | 0 | 0 |
| A504V | 0 | 0 | 0 | 0 | 2 | 0 | 0 | 0 | 0 | 0 | 0 | 0 | 0 | 0 | 0 | 0 | 0 | 0 | 0 | 3 | 0 | 0 | 1 | 0 |
| C489N | 0 | 2 | 0 | 0 | 5 | 1 | 0 | 0 | 2 | 0 | 0 | 0 | 0 | 0 | 1 | 0 | 0 | 19 | 0 | 3 | 1 | 0 | 2 | 0 |
| N499S | 0 | 0 | 0 | 0 | 1 | 0 | 0 | 1 | 0 | 0 | 0 | 0 | 0 | 0 | 0 | 0 | 1 | 0 | 0 | 2 | 0 | 0 | 0 | 0 |
| D501Y | 0 | 0 | 0 | 0 | 0 | 0 | 0 | 0 | 2 | 0 | 0 | 2 | 0 | 0 | 1 | 0 | 0 | 0 | 0 | 0 | 1 | 0 | 0 | 0 |
| V517I | 0 | 0 | 0 | 0 | 2 | 0 | 0 | 2 | 0 | 0 | 0 | 0 | 0 | 1 | 0 | 0 | 1 | 0 | 0 | 2 | 0 | 0 | 1 | 0 |
| S522C | 0 | 2 | 2 | 0 | 6 | 0 | 0 | 0 | 2 | 0 | 1 | 3 | 0 | 1 | 2 | 0 | 3 | 2 | 0 | 5 | 0 | 0 | 0 | 2 |
| N537S | 0 | 0 | 0 | 0 | 2 | 0 | 0 | 0 | 0 | 0 | 0 | 0 | 0 | 0 | 0 | 0 | 0 | 0 | 0 | 0 | 0 | 0 | 0 | 0 |
| **R561H** | 0 | 0 | 0 | 0 | 0 | 0 | 0 | 0 | 0 | 0 | 0 | 0 | 0 | 0 | 4 | 0 | 0 | 0 | 0 | 0 | 1 | 0 | 0 | 0 |
| R561C | 0 | 0 | 1 | 0 | 0 | 1 | 0 | 0 | 0 | 0 | 0 | 0 | 0 | 0 | 1 | 0 | 0 | 0 | 0 | 0 | 1 | 0 | 0 | 0 |
| A569S | 0 | 0 | 0 | 0 | 0 | 0 | 0 | 0 | 0 | 0 | 0 | 0 | 0 | 0 | 3 | 0 | 0 | 0 | 2 | 0 | 2 | 0 | 0 | 0 |
| A569T | 0 | 1 | 0 | 0 | 3 | 2 | 0 | 0 | 0 | 0 | 1 | 1 | 0 | 0 | 0 | 0 | 1 | 1 | 0 | 2 | 2 | 0 | 3 | 1 |
| A578S | 3 | 4 | 3 | 5 | 20 | 8 | 0 | 3 | 3 | 0 | 2 | 12 | 1 | 5 | 6 | 0 | 15 | 13 | 6 | 26 | 13 | 0 | 5 | 3 |
| P553S | 0 | 0 | 0 | 0 | 2 | 0 | 0 | 1 | 0 | 0 | 1 | 0 | 0 | 1 | 0 | 0 | 1 | 0 | 0 | 2 | 0 | 0 | 0 | 0 |
| **P553L** | 0 | 0 | 0 | 0 | 2 | 0 | 0 | 1 | 0 | 0 | 1 | 0 | 0 | 1 | 0 | 0 | 1 | 0 | 0 | 2 | 0 | 0 | 0 | 0 |
| Y558C | 0 | 0 | 0 | 0 | 0 | 0 | 0 | 0 | 0 | 0 | 2 | 0 | 0 | 2 | 0 | 0 | 4 | 0 | 0 | 4 | 0 | 0 | 1 | 0 |
| P667A | 0 | 0 | 1 | 0 | 0 | 0 | 0 | 0 | 0 | 0 | 0 | 0 | 0 | 0 | 0 | 0 | 0 | 0 | 0 | 0 | 0 | 0 | 0 | 0 |
| P667S | 0 | 1 | 1 | 0 | 0 | 1 | 0 | 1 | 10 | 0 | 1 | 0 | 0 | 0 | 2 | 0 | 2 | 1 | 0 | 2 | 3 | 0 | 1 | 0 |
| S679T | 0 | 1 | 0 | 0 | 0 | 0 | 0 | 2 | 0 | 0 | 0 | 0 | 0 | 0 | 0 | 0 | 0 | 0 | 0 | 0 | 0 | 0 | 0 | 0 |
| E691D | 0 | 9 | 0 | 0 | 24 | 0 | 0 | 7 | 0 | 0 | 5 | 0 | 0 | 10 | 0 | 0 | 7 | 0 | 0 | 32 | 0 | 0 | 4 | 0 |
| **A675V** | 0 | 0 | 6 | 0 | 0 | 7 | 0 | 0 | 11 | 0 | 0 | 9 | 0 | 1 | 1 | 0 | 0 | 4 | 0 | 0 | 9 | 0 | 0 | 1 |
| **Total SNPs** | **3** | **22** | **18** | **5** | **76** | **21** | **0** | **18** | **32** | **0** | **15** | **29** | **1** | **26** | **24** | **0** | **41** | **44** | **8** | **98** | **33** | **0** | **19** | **7** |
